# Supplementary material for: Analysis of IGHA1 and other salivary proteins post half marathon in female participants
Source: PeerJ journal article supplement (doi:10.7717/peerj.15075), 2023-05-11

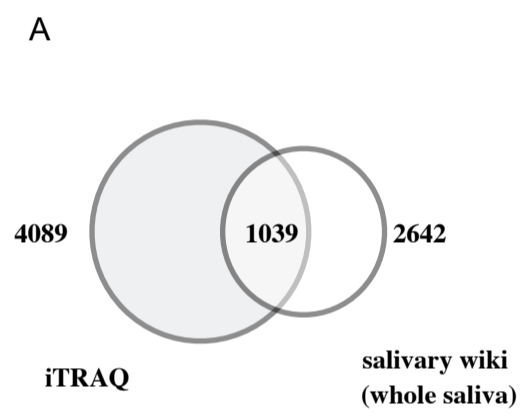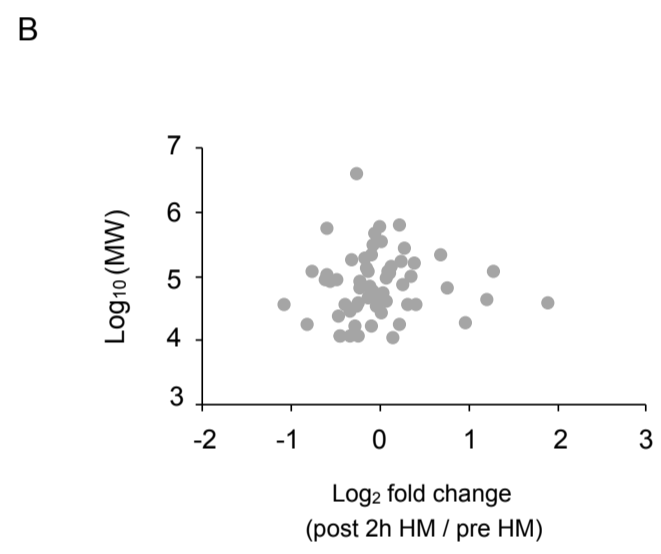

Supplement: FigS2.pdf [file FigS2.pdf]
