# Supplementary material for: Analysis of IGHA1 and other salivary proteins post half marathon in female participants
Source: PeerJ. 2023 May 11;11:e15075. doi: 10.7717/peerj.15075 (PMC10183162; doi:10.7717/peerj.15075)
Supplement: Supplemental Information 1 — The peptide shows unique peptide number in analyses samples. *The subcellular location and tissue specificity shows the localization of detected proteins. Data were from the Human Protein Atlas. n.d; no data. **The mRNA was described as to specifically expressed in any of the salivary glands. The sites of adult salivary glands that were more than twice as active as fetal salivary glands with P < 0.05 were shown. ms; submandibular gland, PAR; parotid gland, SL; sublingual gland. The data of mRNA localization were from (Saitou et al., 2020). ***The whole saliva indicates whether the detected protein is contained in the salivary proteins of the Human Salivary Protein Wiki (https://salivaryproteome.nidcr.nih.gov/). Y; contain in saliva, -; no existence. [file peerj-11-15075-s001.xlsx]

## Sheet: supplymental table 1
Supplemental table 1. List of salivary proteins identified by iTRAQ analysis in pre- and post-half marathon
Accession	Description	Gene name	MW(KDa)	Peptide	p value	Fold change	Predicted location*	mRNA **	whole saliva***
Q8TB03	Uncharacterized protein CXorf38	CX038	36.67	1	0.497764	8.81395	Intracellular	-	-
Q96NW4	Ankyrin repeat domain-containing protein 27	ANR27	116.984	1	0.503994	4.38175	Intracellular	-	-
P40394	Alcohol dehydrogenase class 4 mu/sigma chain	ADH7	41.481	1	0.533207	4.08075	Intracellular	-	Y
P01591	Immunoglobulin J chain	JCHAIN	18.099	2	0.502265	3.03193	Secreted	SM, PAR, SL	-
Q08380	Galectin-3-binding protein	LGALS3BP	65.331	1	0.42931	2.4066	Secreted	SL	Y
Q5JRA6	Transport and Golgi organization protein 1 homolog	MIA3	213.702	1	0.576772	2.24555	Vesicles	SL	-
P23280	Carbonic anhydrase 6 OS=Homo sapiens	CA6	35.367	2	0.604831	1.6131	Secreted to digestive system	SM, PAR	Y
O94964	Protein SOGA1	SOGA1	159.76	1	0.121	1.5939	Secreted to blood	-	-
Q9ULV3	Cip1-interacting zinc finger protein	CIZ1	100.045	1	0.304371	1.52325	Nucleoplasm	-	-
Q96GK7	Fumarylacetoacetate hydrolase domain-containing protein 2A	FAHD2A	34.596	1	0.463168	1.45115	Intracellular	SM, PAR, SL	-
Q9UGM3	Deleted in malignant brain tumors 1 protein	DMBT1	260.735	1	0.463209	1.3794	Centriolar satellite	SL	Y
Q8WYA1	Aryl hydrocarbon receptor nuclear translocator-like protein 2	ARNTL2	70.887	2	0.38439	1.35485	Nucleoplasm, Nucleoli	n.d	-
Q9HAR2	Adhesion G protein-coupled receptor L3	ADGRL3	161.812	1	0.729116	1.32505	Membrane	n.d	-
Q9HC84	Mucin-5B OS=Homo sapiens	MUC5B	596.34	1	0.781512	1.30315	Vesicles	SM, SL	Y
Q6W0C5	Developmental pluripotency-associated protein 3	DPPA3	17.851	1	0.582038	1.2979	n.d	-	-
Q96A98	Tuberoinfundibular peptide of 39 residues	PTH2	11.202	1	0.885713	1.19045	Secreted	-	-
Q9HCE6	Rho guanine nucleotide exchange factor 10-like protein	ARHGEF10L	140.379	2	0.637639	1.16255	Intracellular	-	-
Q9HC35	Echinoderm microtubule-associated protein-like 4	EML4	108.916	1	0.839307	1.14455	Intracellular	-	Y
Q96JE7	Protein transport protein Sec16B	SEC16B	116.604	1	0.822418	1.11435	Intracellular	-	-
Q86X52	Chondroitin sulfate synthase 1	CHSY1	91.784	1	0.899824	1.10365	Secreted	-	-
P30457	HLA class I histocompatibility antigen, A-66 alpha chain	HLA-A	40.841	1	0.038745	1.0919	n.d	SM	-
Q17RR3	Pancreatic lipase-related protein 3	PNLIPRP3	52.254	1	0.861908	1.0612	Secreted	-	-
Q8NFP9	Neurobeachin	NBEA	327.822	1	0.926237	1.03235	Intracellular, Membrane (different isoforms)	SL	Y
P07477	Trypsin-1	PRSS1	26.558	2.7	0.934109	1.02064	Secreted to digestive system	-	-
Q2LD37	Transmembrane protein KIAA1109	KIAA1109	555.482	1	0.471058	1.01765	Intracellular, Membrane (different isoforms)	-	Y
A4D1E9	GTP-binding protein 10	GTPBP10	42.933	1	0.89219	0.98185	Intracellular	-	-
P25311	Zinc-alpha-2-glycoprotein	AZGP1	34.259	7	0.139059	0.9634	Intracellular, Secreted (different isoforms)	SM, PAR, SL	Y
Q8TCU4	Alstrom syndrome protein 1	ALMS1	461.062	1	0.624705	0.9489	n.d	-	Y
P04745	Alpha-amylase 1	AMY1A	57.768	42	0.27565	0.9369	Secreted	SM, PAR	Y
Q8TD26	Chromodomain-helicase-DNA-binding protein 6	CHD6	305.412	1	0.646309	0.926	Secreted	-	Y
Q5VYK3	Proteasome adapter and scaffold protein ECM29	ECPAS	204.291	1	0.605289	0.9154	Secreted	n.d	-
Q9UHL0	ATP-dependent RNA helicase DDX25	DDX25	54.692	1	0.815873	0.9143	Secreted	-	-
P12273	Prolactin-inducible protein	PIP	16.572	5	0.907954	0.9119	Secreted	SM, PAR, SL	Y
P02768	Serum albumin	ALB	69.367	3	0.168206	0.890227	Intracellular, Membrane (different isoforms)	-	Y
Q63HK5	Teashirt homolog 3	TSHZ3	118.566	1	0.530356	0.8653	Intracellular	-	-
O75600	2-amino-3-ketobutyrate coenzyme A ligase, mitochondrial	GCAT	45.285	1	0.038776	0.8639	Intracellular	PAR	-
Q9NPG4	Protocadherin-12 OS=Homo sapiens	PCDH12	128.995	1	0.613503	0.84305	Membrane, Secreted (different isoforms)	-	-
Q5H9F3	BCL-6 corepressor-like protein 1	BCORL1	182.526	1	0.448054	0.82605	Intracellular	n.d	-
P01833	Polymeric immunoglobulin receptor	PIGR	83.284	9	0.051	0.78916	Membrane	SM, PAR, SL	Y
Q9BYE2	Transmembrane protease serine 13	TMPRSS13	63.167	1	0.537343	0.7748	Intracellular, Membrane (different isoforms)	-	-
P0CF74	Immunoglobulin lambda constant 6	IGLC6	11.277	1	0.181148	0.77105	n.d	SM, SL	Y
P01876	Immunoglobulin heavy constant alpha 1	IGHA1	37.655	7	0.004812	0.762336	n.d	SM, PAR, SL	Y
Q8WZ42	Titin	TTN	3816.03	1	0.0737664	0.756	Intracellular, Membrane (different isoforms)	PAR	Y
P17542	T-cell acute lymphocytic leukemia protein 1	TAL1	34.271	1	0.0507339	0.75395	Intracellular	n.d	Y
P01036	Cystatin-S	CST4	16.214	3.5	0.00308493	0.739282	Secreted	SM, PAR,	Y
Q9Y4F5	Centrosomal protein of 170 kDa protein B	CEP170B	171.688	1	0.221471	0.70535	Intracellular	-	Y
P06870	Kallikrein-1 OS=Homo sapiens	KLK1	28.89	4	0.0118128	0.694364	Secreted	SM, PAR, SL	Y
P01834	Immunoglobulin kappa constant	IGKC	11.765	6	0.171335	0.682675	n.d	SM, PAR, SL	-
P78383	Solute carrier family 35 member B1	SLC35B1	35.76	1	0.283535	0.651	Intracellular, Membrane (different isoforms)	SL	-
P0DOY2	Immunoglobulin lambda constant 2	IGLC2	11.294	5	0.297839	0.6101	n.d	SM, PAR, SL	-
P0DOY3	Immunoglobulin lambda constant 3	IGLC3	11.266	1.3	0.13318	0.60015	n.d	SM, PAR, SL	-
P0DOX7	Immunoglobulin kappa light chain	IGK	23.379	6	0.0155536	0.59702	n.d	SM, PAR, SL	Y
Q6P4Q7	Metal transporter CNNM4	CNNM4	86.607	1	0.327856	0.5761	Membrane	-	Y
Q04724	Transducin-like enhancer protein 1	TLE1	83.201	1	0.104639	0.53365	Intracellular	-	-
Q14204	Cytoplasmic dynein 1 heavy chain 1	DYNC1H1	532.408	1	0.221053	0.50745	Intracellular	-	Y
Q15424	Scaffold attachment factor B1	SAFB	102.642	1	0.128813	0.50645	Intracellular	-	-
Q9NVE7	Pantothenate kinase 4	PANK4	85.991	1	0.199223	0.4947	Intracellular	-	-
Q12860	Contactin-1	CNTN1	113.32	1	0.242456	0.42145	Intracellular	-	Y
Q8N910	Putative uncharacterized protein C15orf56	C15orf56	17.04	1	0.119864	0.3912	n.d	-	-
B2RNN3	Complement C1q and tumor necrosis factor-related protein 9B	C1QTNF9B	34.713	1	0.237333	0.293	Secreted	-	-
