# Supplementary material for: Analysis of IGHA1 and other salivary proteins post half marathon in female participants
Source: PeerJ. 2023 May 11;11:e15075. doi: 10.7717/peerj.15075 (PMC10183162; doi:10.7717/peerj.15075)
Supplement: Supplemental Information 4 [file peerj-11-15075-s004.xlsx]

## Sheet: table1
	Age (years)				Body mass (kg)				Length (cm)				BMI (kg / m2)				Running time (min)				Race pace (m / min)				HM Energy consumption (Kcal)				Average HM Energy consumption (Kcal / min)				Total Energy consumption (Kcal)
	sample No	Ex group (ExG) N=19	NEx group (NExG) N=16		sample No	Ex group (ExG) N=19	NEx group (NExG) N=16		sample No	Ex group (ExG) N=19	NEx group (NExG) N=16		sample No	Ex group (ExG) N=19	NEx group (NExG) N=16		sample No	Ex group (ExG) N=19	NEx group (NExG) N=16		sample No	Ex group (ExG) N=19	NEx group (NExG) N=16		sample No	Ex group (ExG) N=19	NEx group (NExG) N=16		sample No	Ex group (ExG) N=19	NEx group (NExG) N=16		sample No	Ex group (ExG) N=19	NEx group (NExG) N=16
	1	19.1	19.2		1	44.8	57.2		1	151	163		1	19.65	21.45		1	148			1	159.8			1	1336.72			1	10.63			1	1973.83	643.23
	2	19.1	18.5		2	46.1	48.5		2	152	157		2	19.95	19.68		2	115			2	180.3			2	1583.01			2	12.13			2	2046.78	581.91
	3	19.2	18.5		3	46.1	54.3		3	152	156		3	19.95	22.19		3	135			3	142.5			3	1176.6			3	8.35			3	1705.12	612.36
	4	19.3	18.7		4	46.8	44.2		4	154	147		4	19.73	20.17		4	126			4	171.5			4	1215.2			4	7.68			4	1446.48	537.87
	5	19.5	18.4		5	47.7	50.1		5	155	150		5	19.85	22.22		5	143			5	188.3			5	1273.07			5	11.94			5	1933.04	577.5
	6	19.7	18.1		6	48.1	60.3		6	155	153		6	20.02	25.63		6	132			6	183.4			6	1086.75			6	10.4			6	1711.4	641.97
	7	20	21.3		7	49.2	68.2		7	156	170		7	20.22	23.53		7	129			7	156.2			7	1086.75			7	7.72			7	1489.48	721.14
	8	20.1	22.1		8	50.2	61.5		8	156	172		8	20.63	20.62		8	137			8	167.4			8	1152.48			8	9.6			8	1732.25	683.76
	9	20.4	21.4		9	50.3	67.8		9	157	178		9	20.41	20.01		9	139			9	147.5			9	1072.5			9	7.88			9	1574.48	739.83
	10	20.5	18.2		10	53.1	47.1		10	159	156		10	21	19.31		10	139			10	197.1			10	1189.48			10	11.67			10	1812.89	571.2
	11	20.5	20.1		11	54.3	48.2		11	160	154		11	21.21	20.24		11	129			11	147.5			11	1437.15			11	12.72			11	2419.98	573.3
	12	20.5	22.4		12	55.7	46.8		12	163	154		12	20.96	19.4		12	132			12	159.8			12	991.76			12	7.89			12	1464.46	561.54
	13	20.8	21.5		13	56.6	48.5		13	163	164		13	21.3	17.85		13	146			13	163.5			13	1053.5			13	8.58			13	1569.23	592.2
	14	20.1	20.1		14	58.2	50.1		14	164	156		14	21.64	20.55		14	135			14	153.9			14	1248.68			14	9.43			14	1792.37	588.84
	15	21.2	22.3		15	62.3	49.2		15	167	158		15	22.34	19.43		15	132			15	151.7			15	1044.35			15	7.89			15	1512.92	588.25
	16	21.2	22.5		16	62.6	47.5		16	169	152		16	21.92	20.34		16	117			16	151.7			16	1498.42			16	11.32			16	2170.71	563.64
	17	21.2			17	66.1			17	172			17	22.34			17	112			17	163.5			17	990.29			17	8.06			17	1475.07
	18	21.3			18	66.6			18	173			18	22.25			18	107			18	159.8			18	991.76			18	7.89			18	1464.46
	19	21.4			19	67.5			19	177			19	21.39			19	143			19	144.5			19	969.44			19	6.97			19	1445.3

## Sheet: fig.2
		saliva flow rate ml/min								protein concentration ug / ml								relative band intensity IGHA1/protein
		NEx group (NExG) N=16			Ex group (ExG) N=19					NEx group (NExG) N=16			Ex group (ExG) N=19					NEx group (NExG) N=16			Ex group (ExG) N=19
	sample No	1st	2nd	3rd	pre	post2h	post4h		sample No	1st	2nd	3rd	pre	post2h	post4h		sample No	1st	2nd	3rd	pre	post2h	post4h
	1	0.9	0.96	1.04	0.74	0.09	0.07		1	105	225	357	284	742	651		1	0.976	1.129	1.097	1.267	0.818	0.827
	2	0.78	0.8	0.56	0.85	1.4	1.79		2	448	487	871	843	789	501		2	0.904	0.969	0.935	1.178	0.838	1.118
	3	1.26	1.04	0.56	0.94	0.63	0.72		3	238	355	336	192	434	1250		3	1.005	0.891	0.808	1.379	0.825	0.829
	4	0.79	0.86	1.11	1.23	0.55	0.4		4	255	219	363	132	704	412		4	1.121	1.225	1.102	1.262	1.102	1.042
	5	1.37	1.39	1.02	0.38	0.19	0.11		5	296	343	415	258	276	201		5	1.042	1.232	1.201	1.291	1.137	1.21
	6	0.09	0.29	0.54	0.76	0.66	0.66		6	487	436	477	594	555	694		6	1.083	1.14	1.119	1.042	0.412	0.831
	7	0.7	0.92	0.69	0.27	0.22	0.05		7	491	382	359	278	180	959		7	1.372	1.53	1.192	1.261	0.91	0.786
	8	1.03	1.16	1	0.81	0.63	0.45		8	340	620	595	241	923	538		8	1.118	1.434	1.103	1.092	0.51	0.704
	9	1.08	1.13	1	0.13	0.12	0.03		9	339	448	447	425	262	475		9	1.246	0.926	0.915	1.11	0.827	1.104
	10	1.11	0.75	1.11	0.47	0.32	0.04		10	203	239	358	421	725	832		10	1.132	1.418	0.873	0.148	0.931	0.94
	11	0.79	0.78	1.34	0.43	0.13	0.53		11	557	458	356	176	580	466		11	1.26	0.983	0.985	1.273	0.859	1.224
	12	1.43	1.38	1.33	1.45	1.3	0.78		12	594	512	540	166	516	754		12	1.19	1.363	0.951	1.322	0.341	0.709
	13	0.74	1	0.95	1.77	1.09	0.8		13	800	626	717	258	602	420		13	1.13	1.159	0.816	1.237	0.793	0.839
	14	1.16	1.09	1.3	0.77	0.96	0.48		14	264	529	517	290	686	195		14	1.225	0.905	0.907	1.123	0.637	0.982
	15	0.61	0.95	1.1	0.93	0.61	0.31		15	643	543	661	434	450	532		15	1.159	1.077	1.12	1.12	0.349	0.957
	16	1.36	1.58	1.2	0.58	0.54	0.07		16	581	543	543	604	504	278		16	1.017	1.26	2.093	1.063	0.278	0.541
	17				1.53	1.21	0.6		17				230	424	762		17				1.197	0.526	0.902
	18				0.81	0.67	0.26		18				299	466	683		18				1.107	0.307	0.447
	19				0.59	0.43	1.56		19				317	248	846		19				1.043	0.935	1.115

## Sheet: fig.4
				relative band intensity KLK1/protein								relative band intensity CST4/protein								relative band intensity IGK/protein
				NEx group (NExG) N=16			Ex group (ExG) N=19					NEx group (NExG) N=16			Ex group (ExG) N=19					NEx group (NExG) N=16			Ex group (ExG) N=19
			sample No	1st	2nd	3rd	pre	post2h	post4h		sample No	1st	2nd	3rd	pre	post2h	post4h		sample No	1st	2nd	3rd	pre	post2h	post4h
			1	1.124	1.299	0.838	0.963	1.109	0.879		1	1.075	2.182	2.34	1.105	0.434	0.577		1	1.14	1.199	2.422	1.044	1.115	0.879
			2	1.004	1.22	1.622	0.983	1.198	0.419		2	1.104	1.45	1.603	0.986	0.967	0.65		2	0.938	1.22	1.788	1.136	1.155	1.545
			3	1.033	0.742	1.17	0.868	0.863	1.019		3	0.587	1.346	1.537	0.98	0.906	1.131		3	0.995	1.201	1.19	0.929	0.885	0.885
			4	0.948	0.775	0.326	1.102	1.257	1.41		4	0.964	1.483	1.569	0.866	0.997	0.753		4	1.071	1.257	1.118	0.963	1.346	1.645
			5	0.974	2.461	1.768	1.297	1.042	1.328		5	0.97	1.251	1.177	0.975	0.587	1.429		5	0.929	0.82	1.43	1.126	1.042	1.123
			6	0.992	1.777	2.144	1.028	0.645	1.125		6	0.882	1.102	1.16	0.956	0.6	0.435		6	1.035	0.742	1.319	0.88	0.676	1.26
			7	1.127	1.037	1.244	1.003	0.646	0.503		7	0.748	1.088	1.156	0.93	1.268	1.132		7	1.238	0.775	1.244	0.913	0.616	0.503
			8	1.188	1.448	1.107	1.175	0.13	0.721		8	1.105	1.108	1.248	1.221	0.365	0.74		8	0.983	1.357	1.213	0.94	0.129	0.311
			9	1.204	2.586	1.267	0.978	0.353	0.554		9	1.145	1.193	1.107	0.912	0.435	0.401		9	1.046	1.177	1.205	0.826	0.345	1.03
			10	0.962	1.36	2.257	0.89	0.709	0.311		10	1.096	0.981	0.873	0.988	0.809	1.037		10	1.26	1.209	1.066	1.257	0.699	0.814
			11	0.921	0.885	0.532	0.943	0.242	0.495		11	1.076	0.849	0.905	0.983	0.437	0.326		11	1.076	1.237	1.173	1.033	0.259	0.305
			12	1.126	1.285	1.136	1.067	0.677	0.488		12	0.967	0.893	0.809	1.049	0.767	1.212		12	1.037	1.148	0.893	1.025	0.689	0.491
			13	1.099	0.936	1.329	1.111	1.065	0.875		13	0.915	0.742	0.827	1.084	1.204	0.615		13	0.887	2.433	0.864	0.981	1.005	1.769
			14	1.069	1.242	1.207	1.245	0.728	0.516		14	1.065	0.718	1.026	1.087	0.619	0.532		14	0.894	1.06	0.571	0.961	0.766	0.983
			15	1.074	1.232	1.211	1.271	0.957	0.429		15	1.04	0.765	0.775	1.178	0.89	0.522		15	1.024	0.885	0.462	1.061	0.318	1.707
			16	1.021	1.021	0.954	1.016	0.51	0.645		16	0.957	0.822	0.808	1.059	0.699	0.513		16	1.049	0.985	0.209	1.026	0.671	0.708
			17				0.801	0.851	0.699		17				1.156	0.428	0.311		17				1.032	0.241	0.823
			18				1.032	0.99	0.759		18				1.029	1.225	1.209		18				0.973	0.691	0.495
			19				0.982	1.181	1.103		19				1.085	0.629	0.521		19				0.98	0.666	1.125

## Sheet: fig.5
				IGHA1		CST4		IGK		KLK1
			sample No	post2h	post4h	post2h	post4h	post2h	post4h	post2h	post4h
			1	0.818	0.827	0.434	0.577	1.115	0.879	1.109	0.879
			2	0.838	1.118	0.967	0.65	1.155	1.545	1.198	0.419
			3	0.825	0.829	0.906	1.131	0.885	0.885	0.863	1.019
			4	1.102	1.042	0.997	0.753	1.346	1.645	1.257	1.41
			5	1.137	1.21	0.587	1.429	1.042	1.123	1.042	1.328
			6	0.412	0.831	0.6	0.435	0.676	1.26	0.645	1.125
			7	0.91	0.786	1.268	1.132	0.616	0.503	0.646	0.503
			8	0.51	0.704	0.365	0.74	0.129	0.311	0.13	0.721
			9	0.827	1.104	0.435	0.401	0.345	1.03	0.353	0.554
			10	0.931	0.94	0.809	1.037	0.699	0.814	0.709	0.311
			11	0.859	1.224	0.437	0.326	0.259	0.305	0.242	0.495
			12	0.341	0.709	0.767	1.212	0.689	0.491	0.677	0.488
			13	0.793	0.839	1.204	0.615	1.005	1.769	1.065	0.875
			14	0.637	0.982	0.619	0.532	0.766	0.983	0.728	0.516
			15	0.349	0.957	0.89	0.522	0.318	1.707	0.957	0.429
			16	0.278	0.541	0.699	0.513	0.671	0.708	0.51	0.645
			17	0.526	0.902	0.428	0.311	0.241	0.823	0.851	0.699
			18	0.307	0.447	1.204	1.209	0.691	0.495	0.99	0.759
			19	0.935	1.115	0.629	0.521	0.666	1.125	1.181	1.103
