# Supplementary material for: Analysis of IGHA1 and other salivary proteins post half marathon in female participants
Source: PeerJ journal article supplement (doi:10.7717/peerj.15075), 2023-05-11
Supplement: WB_image.zip [file WB_image.zip]

Fig2.C CBB stain gel

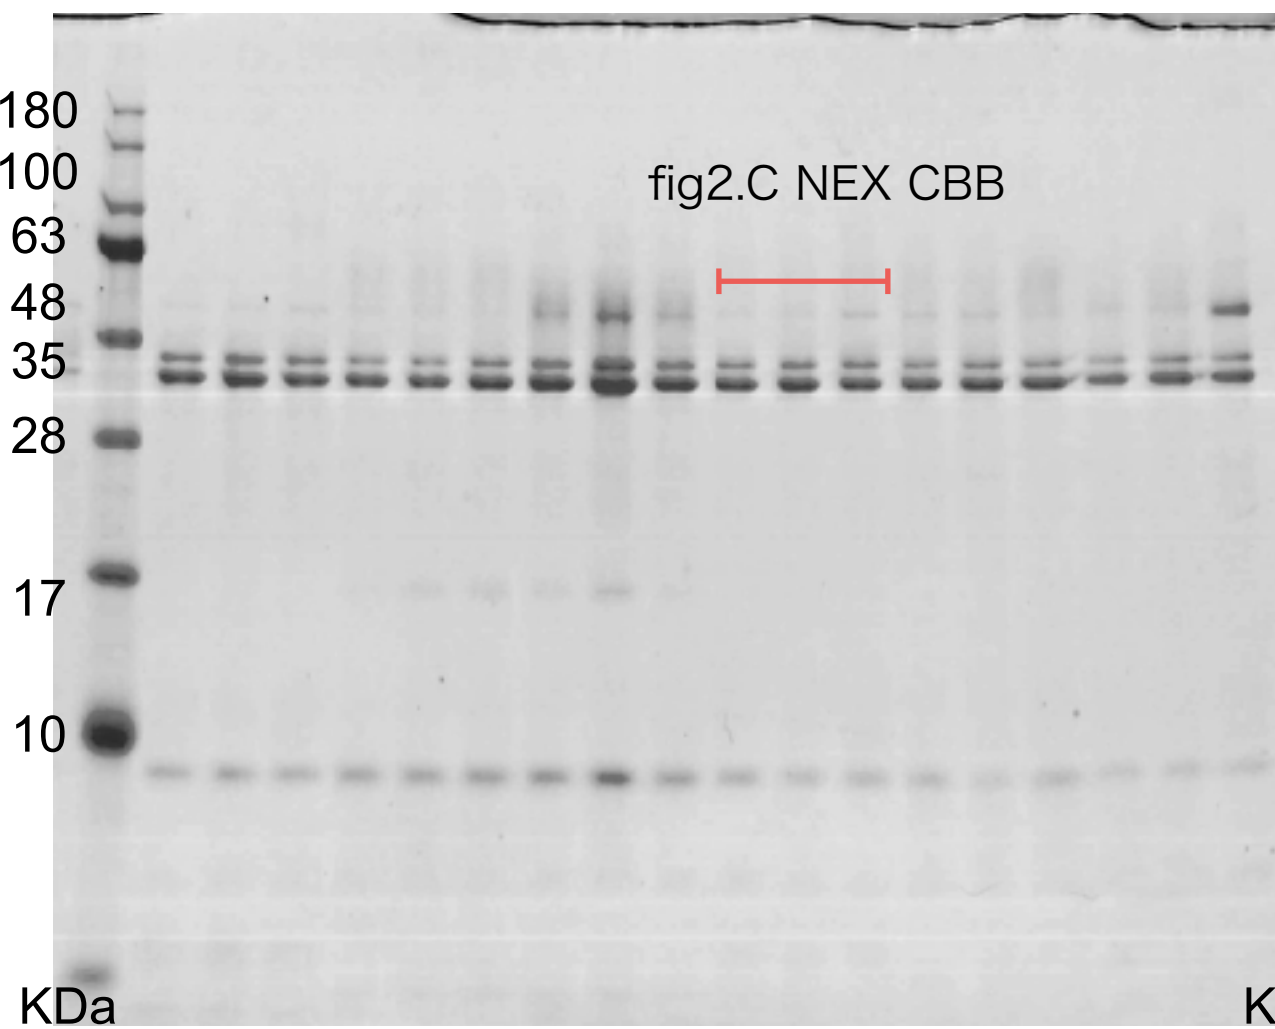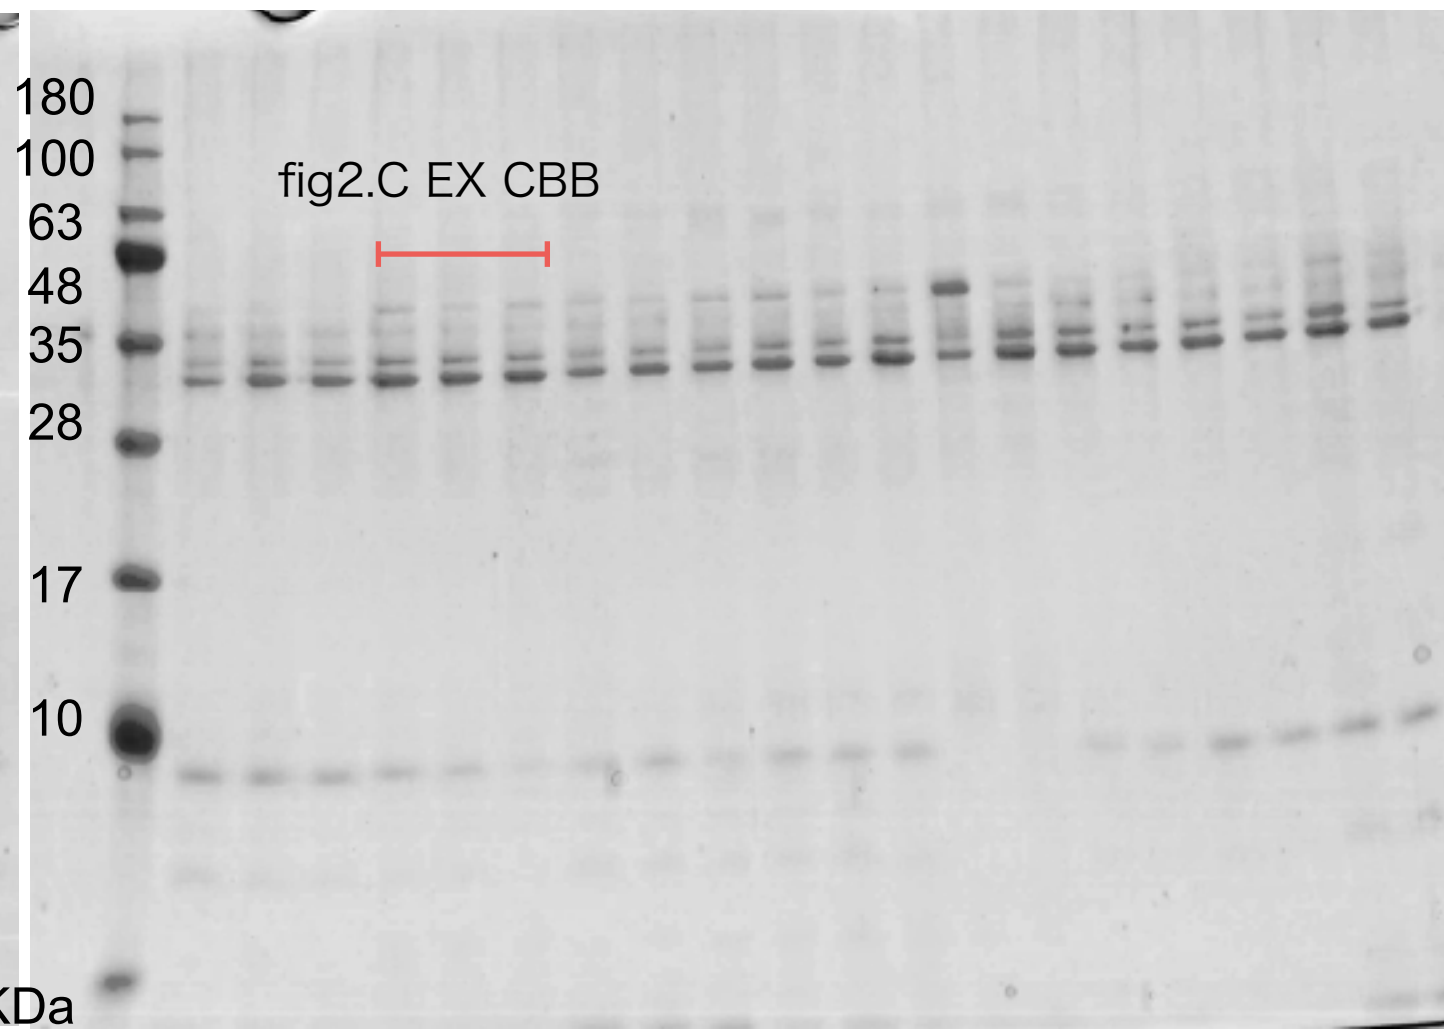

**Raw data was saved in WB image folder named cbb gel**

Fig2.C α IGHA1

IGHA1≐37KDa

KDa

48 —  
35 —  
28 —

Fig2.C NEx IGHA1

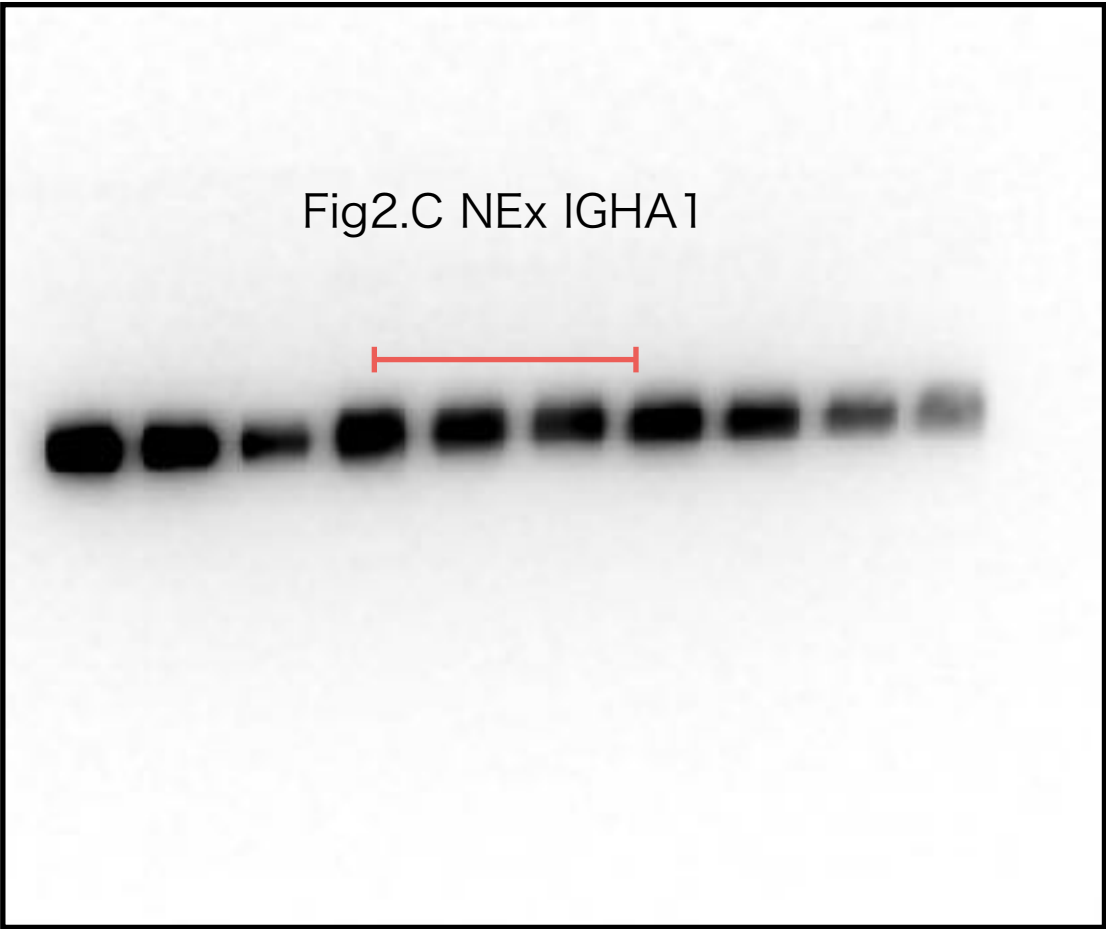

Raw data was saved in WB image folder named IGHA1\_NExG

Fig2.C Ex IGHA1

KDa

48 —  
35 —  
28 —

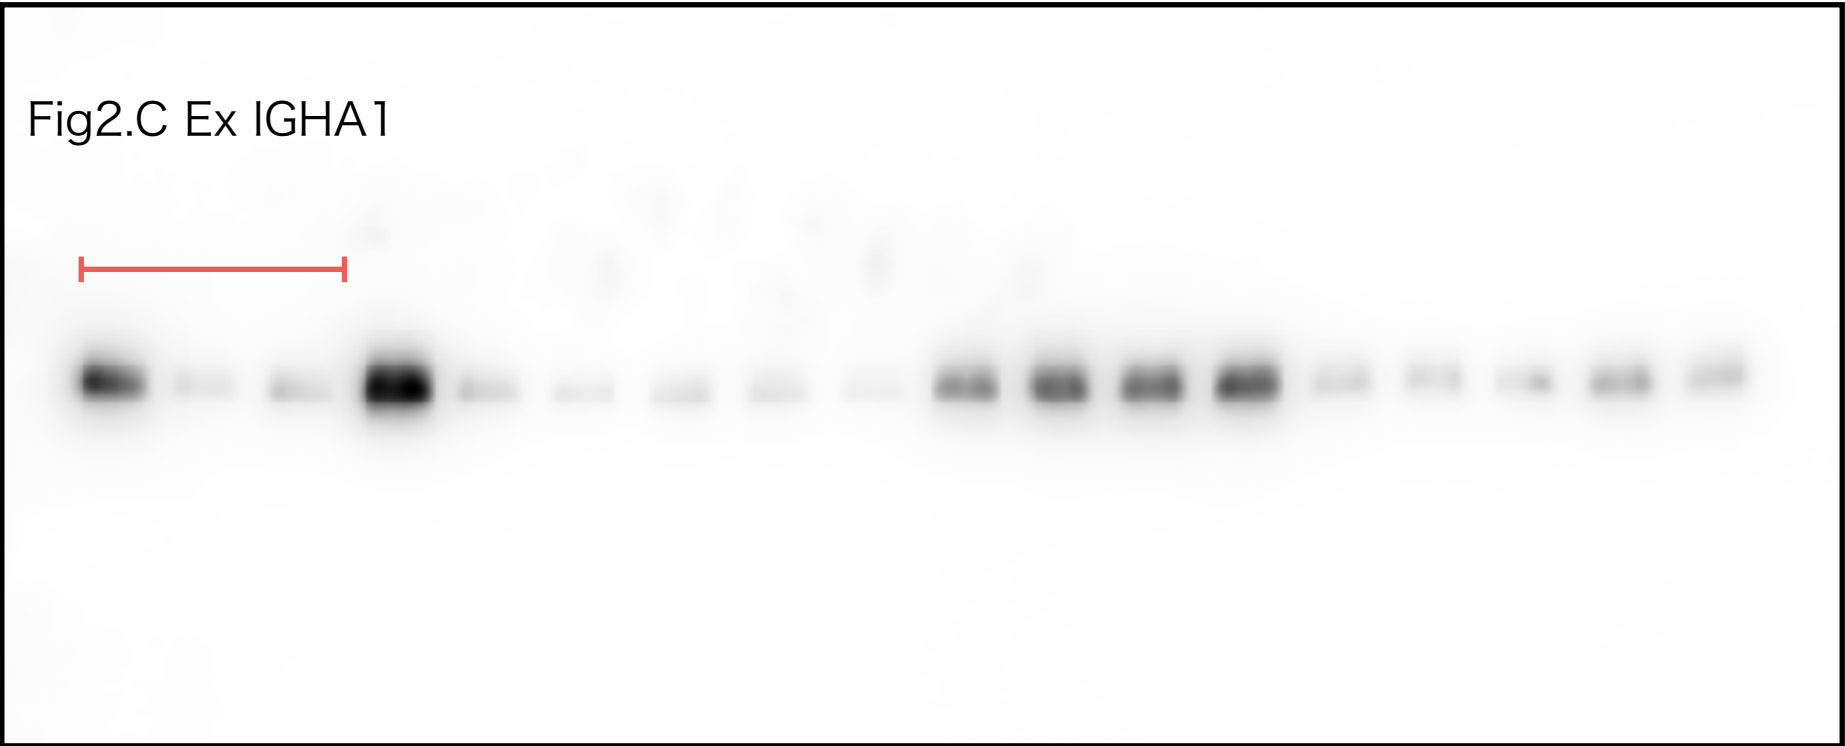

Raw data was saved in WB image folder named IGHA1\_ExG

Fig3.D WB

KLK1  $\approx$  28KDa

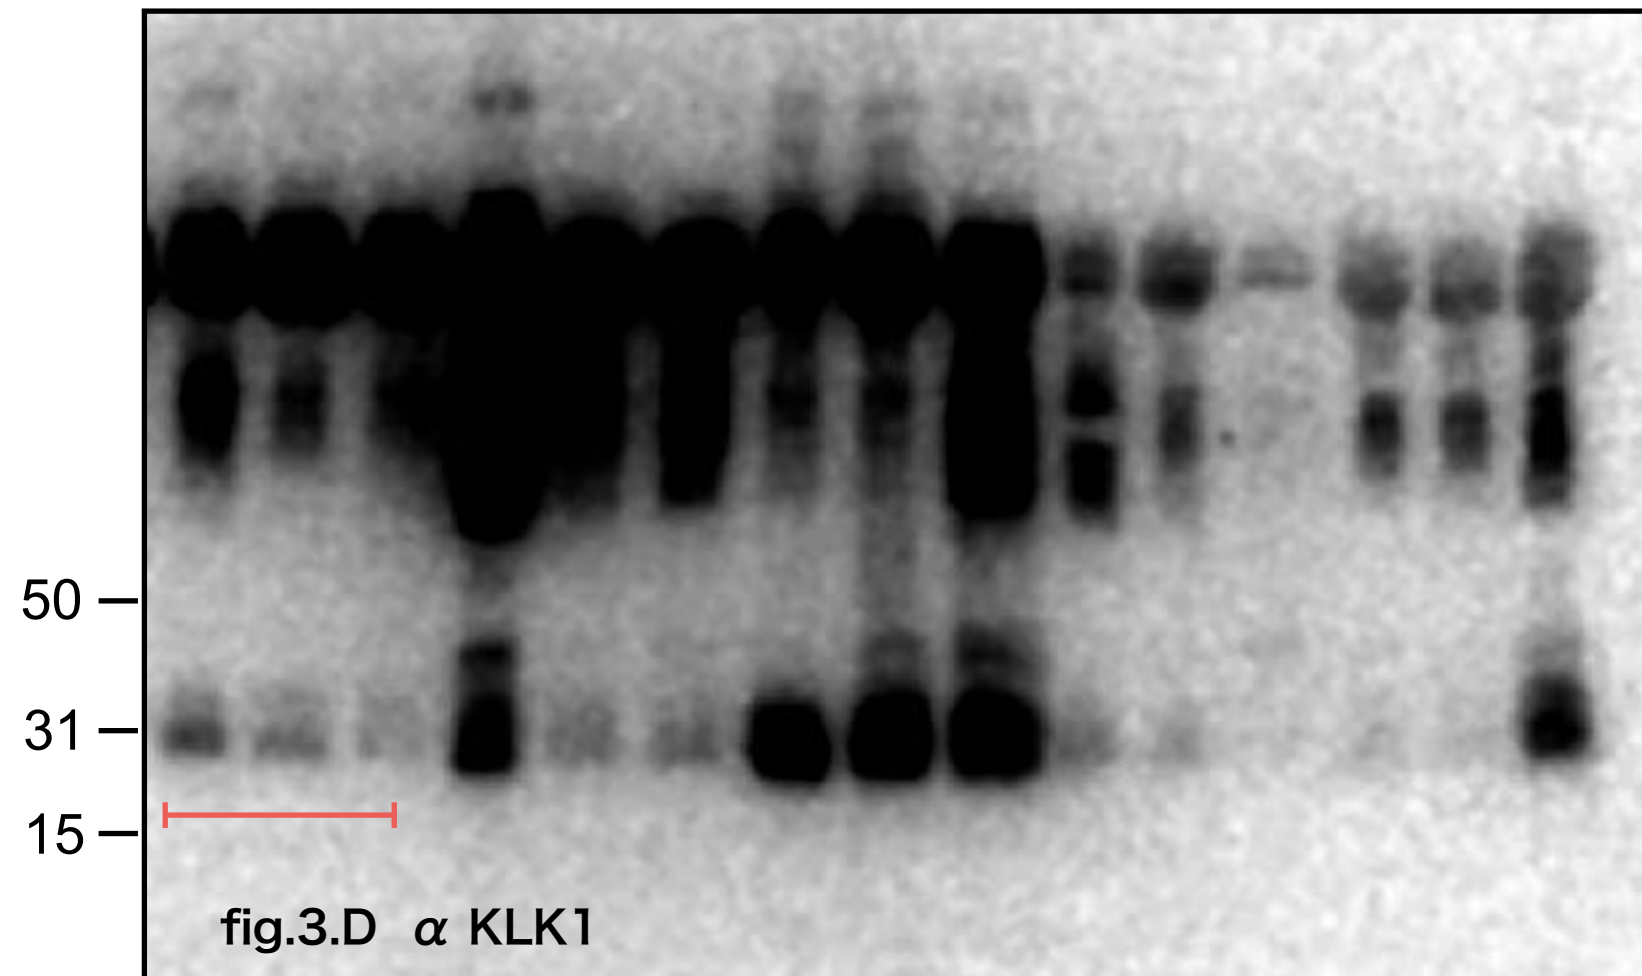

**Raw data was saved in WB image folder named klk1\_traq**

AZGP1  $\approx$  34KDa

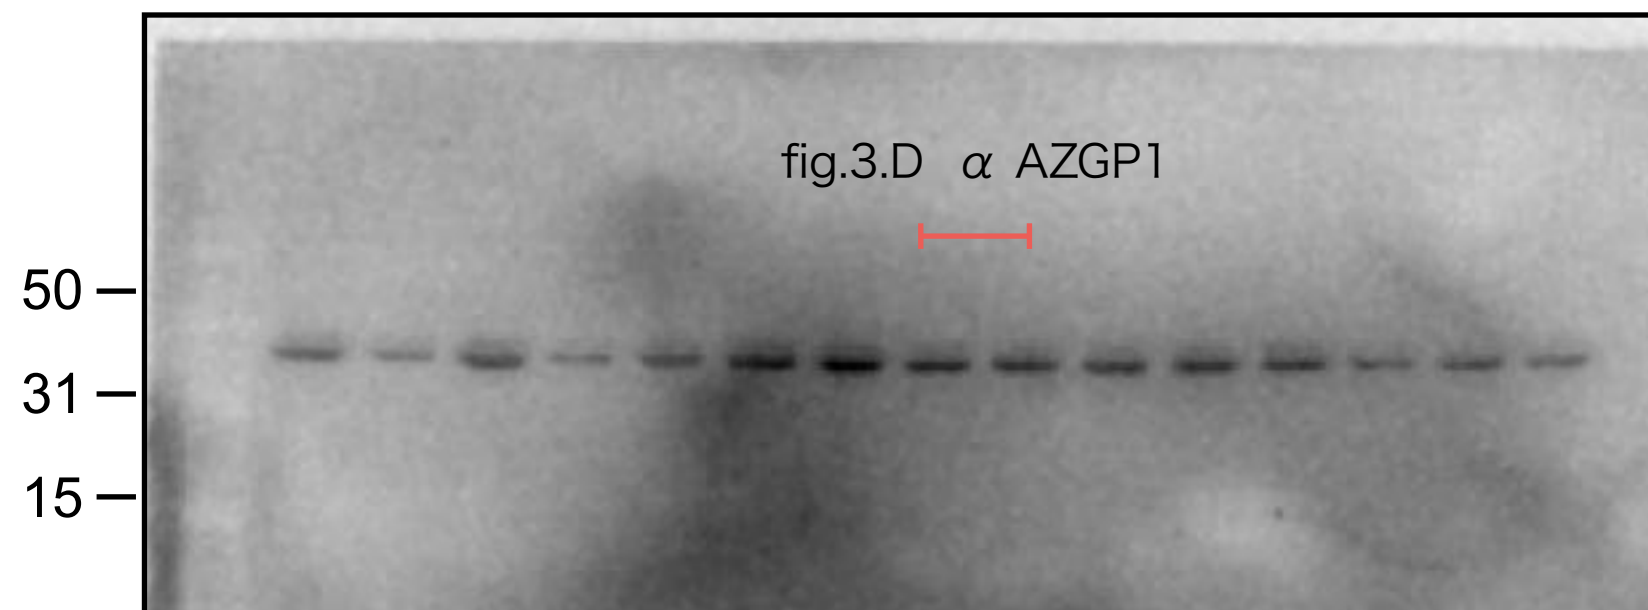

**Raw data was saved in WB image folder named azgp1\_itraq**

Fig3.D WB

IGK $\approx$ 23KDa

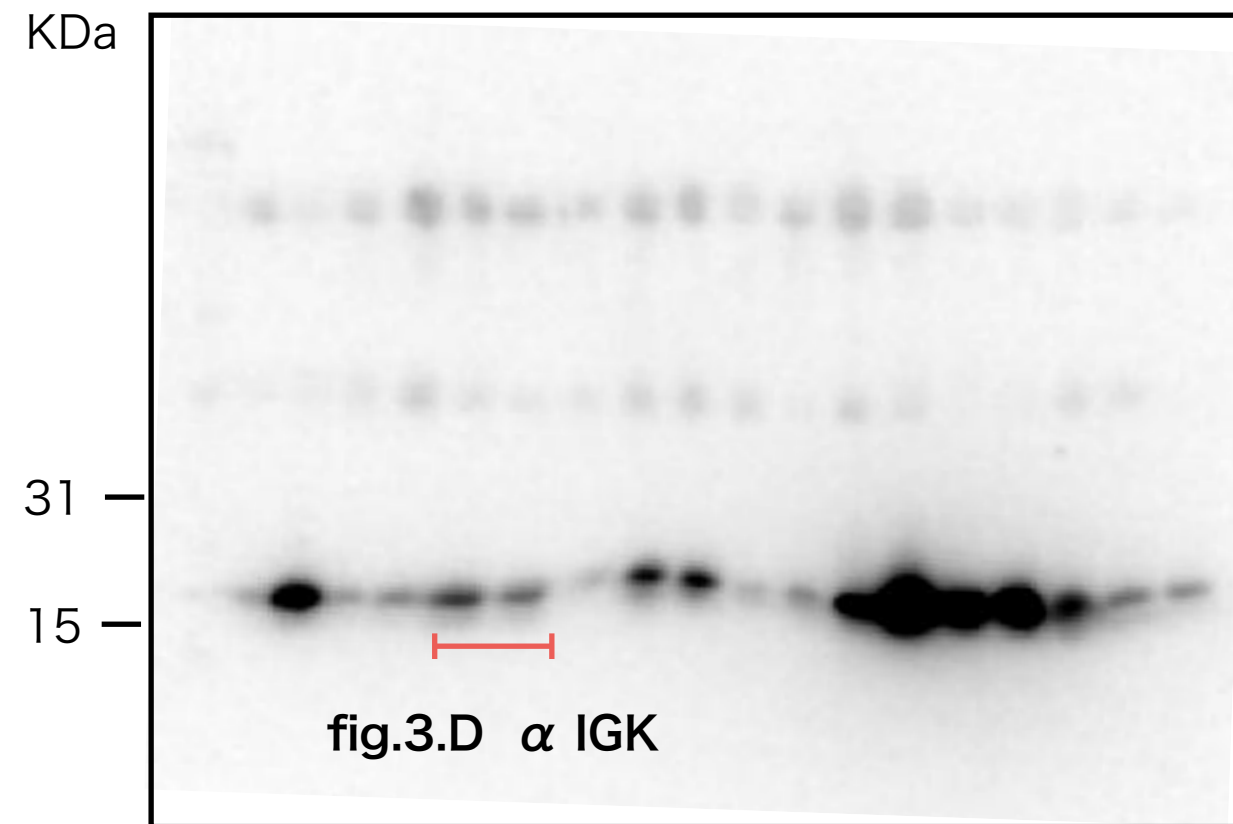

Raw data was saved in WB image folder named igk\_itraq

CST4 $\approx$ 16KDa

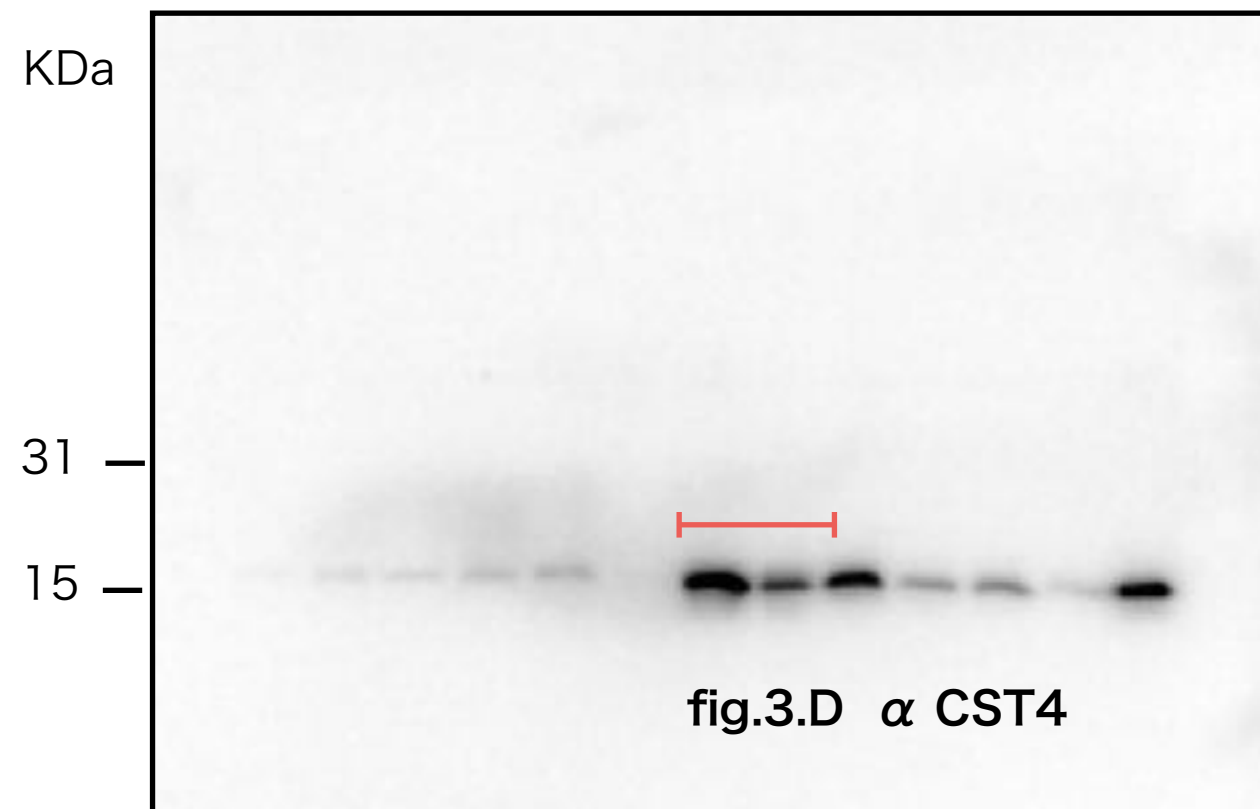

Raw data was saved in WB image folder named cst4\_itraq

Figs1 silver satin

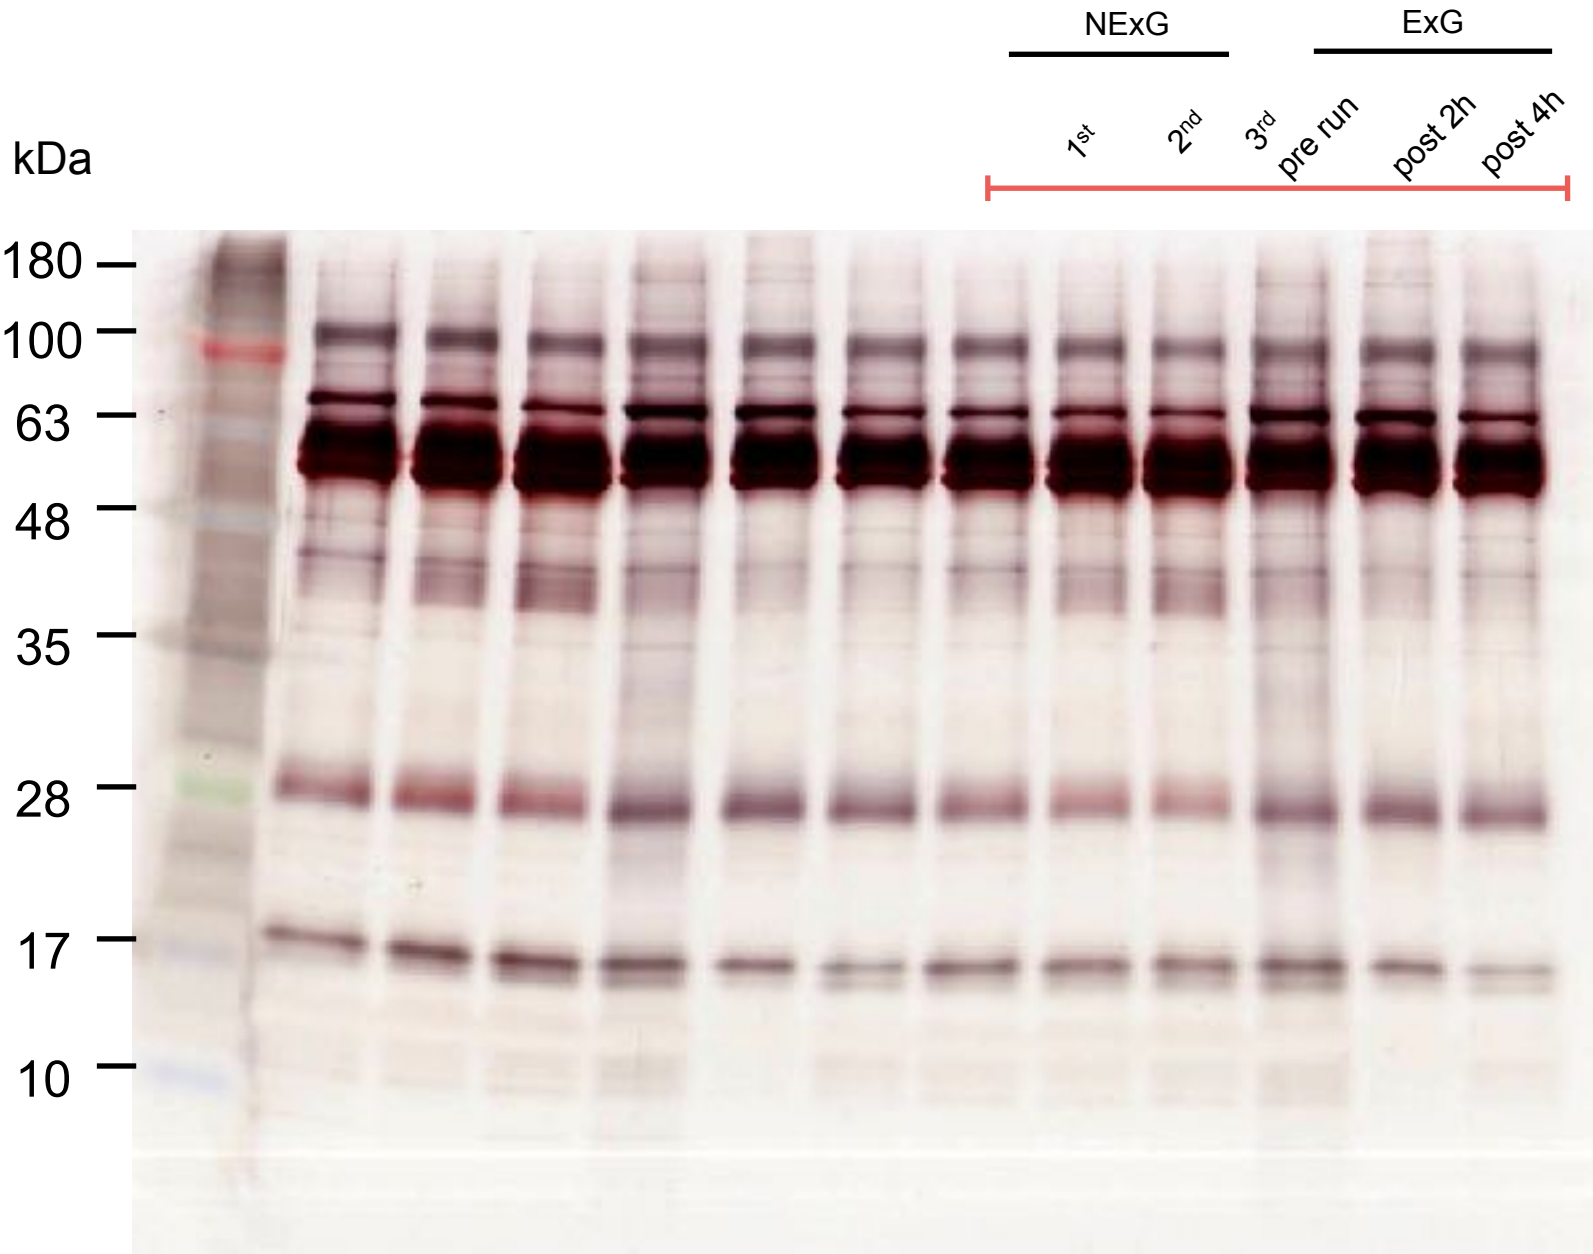

Raw data was saved in WB image folder named silver\_stain
